# Supplementary material for: Barium ferrite decorated reduced graphene oxide nanocomposite for effective electromagnetic interference shielding
Source: Royal Society of Chemistry journal article supplement (doi:10.1039/c4cp04284k), 2014-11-19
Supplement: c4cp04284k1.pdf [file c4cp04284k1.pdf]

**Electronic Supplementary Information:**

**Barium ferrite decorated reduced graphene oxide nanocomposite for  
effective electromagnetic interference shielding**

**Meenakshi Verma<sup>a</sup>, Avanish Pratap Singh<sup>b</sup>, Pradeep Sambyal<sup>b</sup>, Bhanu Pratap Singh<sup>c</sup>, S. K.  
Dhawan<sup>b</sup>, and Veena Choudhary<sup>a\*</sup>**

<sup>a</sup> Centre for Polymer Science & Engineering, Indian Institute of Technology, Hauz Khas,  
New Delhi, 110016, India

<sup>b</sup> Polymeric & Soft Materials Section, National Physical Laboratory (CSIR)  
Dr. K. S. Krishnan Road, New Delhi, 110 012, India

<sup>c</sup> Physics and Engineering of Carbon, CSIR-National Physical Laboratory  
Dr. K. S. Krishnan Road, New Delhi, 110 012, India

\*E-mail: [veenach@hotmail.com](mailto:veenach@hotmail.com)

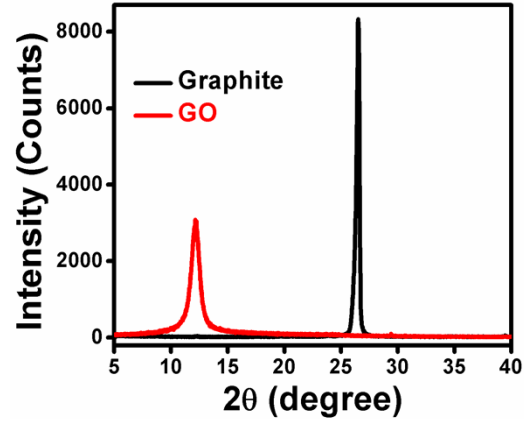

Fig. S1 XRD pattern of graphite and GO

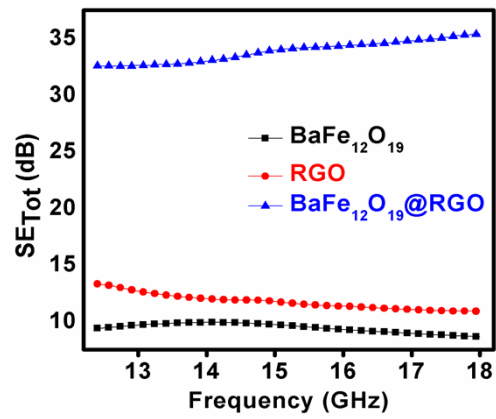

Fig S2 Variation in EMI shielding effectiveness  $SE_T$  of  $BaFe_{12}O_{19}$ , RGO and  $BaFe_{12}O_{19}@RGO$  nanocomposite at a critical thickness of 3mm
